# Supplementary material
Source: PubMed Central journal article supplement (PMC6993936)
Supplement: NIHMS1064235-supplement-supplemental.pdf [file NIHMS1064235-supplement-supplemental.pdf]

ARTICLE TYPE

Cite this: DOI: 10.1039/xxxxxxxxxx

## Supplementary Information for Na<sup>+</sup>-binding modes involved in thrombin's allosteric response as revealed by molecular dynamics simulations, correlation networks and Markov modeling

Jiajie Xiao,<sup>a,b</sup> and Freddie R. Salsbury, Jr<sup>\*a</sup>

Received Date

Accepted Date

DOI: 10.1039/xxxxxxxxxx

[www.rsc.org/journalname](http://www.rsc.org/journalname)

<sup>a</sup> Department of Physics, Wake Forest University, Winston Salem, NC, USA. Fax: +1 (336) 758-6142; Tel: +1 (336) 758-4975; E-mail: [salsbufr@wfu.edu](mailto:salsbufr@wfu.edu)

<sup>b</sup> Department of Computer Science, Wake Forest University, Winston Salem, NC, USA.

**Table S1** Na<sup>+</sup>-binding statistics for Na<sup>+</sup>-residue contacts. ResID is followed by the sequential residue numbering scheme for thrombin in literature<sup>1,2</sup>. The statistics were calculated over all Na<sup>+</sup> ions and runs. The present table was sorted by the fourth column to highlight residues contributing kinetically stable Na<sup>+</sup>-binding. The NA values in the table stand for not available, indicating no unbinding event was detected within each 0.1 ns time step.

| ResID (sequential numbering scheme) | ResNum (chymotrypsin numbering scheme) | Occupancy | Mean Residence Time (ns) | Standard errors in residence time (ns) | Number of Na <sup>+</sup> -binding events |
|-------------------------------------|----------------------------------------|-----------|--------------------------|----------------------------------------|-------------------------------------------|
| 235                                 | ASP189                                 | 0.56      | 31.2                     | 0.2                                    | 356                                       |
| 236                                 | ALA190                                 | 0.55      | 20.5                     | 0.2                                    | 336                                       |
| 272                                 | LYS224                                 | 0.04      | 9.1                      | 0.3                                    | 232                                       |
| 269                                 | ARG221                                 | 0.04      | 6.5                      | 0.2                                    | 457                                       |
| 213                                 | THR172                                 | 0.02      | 4.6                      | 0.2                                    | 155                                       |
| 210                                 | LYS169                                 | 0.02      | 3.8                      | 0.2                                    | 145                                       |
| 268                                 | ASP221A                                | 0.09      | 3.4                      | 0.1                                    | 588                                       |
| 238                                 | GLU192                                 | 0.07      | 2.7                      | 0.1                                    | 199                                       |
| 94                                  | ASP63                                  | 0.06      | 2.5                      | 0.0                                    | 196                                       |
| 92                                  | GLU61                                  | 0.04      | 2.2                      | 0.1                                    | 214                                       |
| 27                                  | GLU14E                                 | 0.07      | 2.1                      | 0.0                                    | 432                                       |
| 61                                  | GLU39                                  | 0.01      | 2.1                      | 0.1                                    | 139                                       |
| 71                                  | ASP49                                  | 0.04      | 2.0                      | 0.1                                    | 262                                       |
| 241                                 | SER195                                 | 0.00      | 1.8                      | 0.2                                    | 20                                        |
| 234                                 | GLY188                                 | 0.00      | 1.7                      | 0.2                                    | 47                                        |
| 8                                   | ASP1A                                  | 0.09      | 1.6                      | 0.0                                    | 396                                       |
| 205                                 | GLU164                                 | 0.05      | 1.5                      | 0.0                                    | 228                                       |
| 79                                  | HSD57                                  | 0.00      | 1.3                      | 0.1                                    | 24                                        |
| 30                                  | GLU14H                                 | 0.15      | 1.3                      | 0.0                                    | 909                                       |
| 230                                 | GLU186B                                | 0.09      | 1.3                      | 0.0                                    | 559                                       |
| 87                                  | ASP60E                                 | 0.18      | 1.3                      | 0.0                                    | 856                                       |
| 118                                 | GLU86                                  | 0.08      | 1.3                      | 0.0                                    | 689                                       |
| 42                                  | ASP21                                  | 0.13      | 1.3                      | 0.0                                    | 899                                       |
| 291                                 | ASP243                                 | 0.15      | 1.3                      | 0.0                                    | 926                                       |
| 39                                  | GLU18                                  | 0.17      | 1.3                      | 0.0                                    | 910                                       |
| 31                                  | SER14I                                 | 0.03      | 1.3                      | 0.1                                    | 363                                       |
| 295                                 | GLU247                                 | 0.35      | 1.3                      | 0.0                                    | 1802                                      |
| 158                                 | ASP125                                 | 0.03      | 1.2                      | 0.0                                    | 186                                       |
| 290                                 | ILE242                                 | 0.00      | 1.2                      | 0.1                                    | 59                                        |
| 270                                 | ASP222                                 | 0.12      | 1.2                      | 0.0                                    | 928                                       |
| 130                                 | GLU97A                                 | 0.04      | 1.2                      | 0.0                                    | 541                                       |
| 262                                 | SER214                                 | 0.00      | 1.1                      | 0.1                                    | 42                                        |
| 211                                 | ASP170                                 | 0.14      | 1.1                      | 0.0                                    | 958                                       |
| 34                                  | ASP15                                  | 0.28      | 1.1                      | 0.0                                    | 1773                                      |
| 44                                  | GLU23                                  | 0.08      | 1.1                      | 0.0                                    | 726                                       |
| 273                                 | TYR225                                 | 0.01      | 1.1                      | 0.1                                    | 188                                       |
| 36                                  | ARG17                                  | 0.33      | 1.0                      | 0.0                                    | 2150                                      |
| 22                                  | ASP14                                  | 0.02      | 1.0                      | 0.1                                    | 376                                       |
| 229                                 | ASP186A                                | 0.12      | 1.0                      | 0.0                                    | 1001                                      |
| 149                                 | ASP116                                 | 0.01      | 1.0                      | 0.0                                    | 140                                       |
| 16                                  | GLU8                                   | 0.08      | 1.0                      | 0.0                                    | 635                                       |
| 265                                 | GLU217                                 | 0.02      | 1.0                      | 0.0                                    | 354                                       |
| 6                                   | GLU0                                   | 0.09      | 0.9                      | 0.0                                    | 727                                       |
| 219                                 | ASP178                                 | 0.02      | 0.9                      | 0.0                                    | 197                                       |

|     |         |      |     |     |      |
|-----|---------|------|-----|-----|------|
| 167 | GLN131  | 0.03 | 0.8 | 0.0 | 679  |
| 266 | GLY219  | 0.26 | 0.8 | 0.0 | 4471 |
| 160 | GLU127  | 0.09 | 0.8 | 0.0 | 782  |
| 21  | GLU13   | 0.11 | 0.8 | 0.0 | 1232 |
| 33  | ILE14K  | 0.02 | 0.7 | 0.0 | 561  |
| 264 | GLY216  | 0.01 | 0.7 | 0.0 | 191  |
| 182 | GLU146  | 0.03 | 0.6 | 0.0 | 328  |
| 166 | LEU130  | 0.00 | 0.5 | 0.1 | 76   |
| 156 | LEU123  | 0.00 | 0.5 | 0.1 | 3    |
| 108 | GLU77   | 0.00 | 0.5 | 0.0 | 109  |
| 293 | PHE245  | 0.01 | 0.4 | 0.0 | 332  |
| 163 | ALA129A | 0.01 | 0.4 | 0.0 | 147  |
| 294 | GLY246  | 0.01 | 0.4 | 0.0 | 320  |
| 25  | GLU14C  | 0.01 | 0.4 | 0.0 | 215  |
| 207 | PRO166  | 0.00 | 0.3 | 0.0 | 131  |
| 161 | THR128  | 0.01 | 0.3 | 0.0 | 159  |
| 3   | GLY-3   | 0.01 | 0.3 | 0.0 | 199  |
| 271 | GLY223  | 0.01 | 0.3 | 0.0 | 199  |
| 212 | SER171  | 0.01 | 0.3 | 0.0 | 191  |
| 183 | THR147  | 0.01 | 0.3 | 0.0 | 253  |
| 72  | ARG50   | 0.02 | 0.3 | 0.0 | 579  |
| 197 | GLN156  | 0.02 | 0.3 | 0.0 | 689  |
| 69  | ILE47   | 0.00 | 0.3 | 0.1 | 2    |
| 35  | GLY16   | 0.07 | 0.3 | 0.0 | 1653 |
| 40  | GLY19   | 0.03 | 0.3 | 0.0 | 694  |
| 203 | ILE162  | 0.00 | 0.3 | 0.0 | 7    |
| 93  | ASN62   | 0.02 | 0.3 | 0.0 | 401  |
| 70  | SER48   | 0.00 | 0.2 | 0.0 | 141  |
| 250 | PRO204  | 0.01 | 0.2 | 0.0 | 189  |
| 292 | GLN244  | 0.02 | 0.2 | 0.0 | 675  |
| 140 | LYS107  | 0.04 | 0.2 | 0.0 | 1169 |
| 228 | PRO186  | 0.01 | 0.2 | 0.0 | 431  |
| 32  | TYR14J  | 0.01 | 0.2 | 0.0 | 454  |
| 4   | SER-2   | 0.01 | 0.2 | 0.0 | 351  |
| 170 | TYR134  | 0.01 | 0.2 | 0.0 | 337  |
| 102 | HSD71   | 0.00 | 0.2 | 0.0 | 127  |
| 1   | THR-5   | 0.01 | 0.2 | 0.0 | 381  |
| 7   | ALA1B   | 0.00 | 0.2 | 0.0 | 148  |
| 29  | LEU14G  | 0.00 | 0.2 | 0.0 | 101  |
| 226 | TYR184A | 0.00 | 0.2 | 0.0 | 73   |
| 253 | ASN205  | 0.01 | 0.2 | 0.0 | 212  |
| 84  | PRO60B  | 0.04 | 0.2 | 0.0 | 1020 |
| 186 | ALA147C | 0.00 | 0.2 | 0.0 | 134  |
| 91  | THR60I  | 0.02 | 0.2 | 0.0 | 635  |
| 267 | CYS220  | 0.06 | 0.2 | 0.0 | 1917 |
| 263 | TRP215  | 0.00 | 0.2 | 0.0 | 124  |
| 142 | LYS109  | 0.00 | 0.2 | 0.0 | 172  |
| 168 | ALA132  | 0.01 | 0.2 | 0.0 | 191  |
| 133 | ASP100  | 0.01 | 0.2 | 0.0 | 248  |
| 2   | PHE-4   | 0.01 | 0.2 | 0.0 | 199  |
| 233 | ARG187  | 0.04 | 0.2 | 0.0 | 1483 |
| 19  | SER11   | 0.03 | 0.2 | 0.0 | 934  |
| 164 | SER129B | 0.01 | 0.2 | 0.0 | 317  |
| 43  | ALA22   | 0.00 | 0.2 | 0.0 | 205  |

|     |         |      |     |     |     |
|-----|---------|------|-----|-----|-----|
| 85  | PRO60C  | 0.02 | 0.2 | 0.0 | 677 |
| 278 | HSD230  | 0.00 | 0.2 | 0.0 | 18  |
| 187 | ASN147D | 0.01 | 0.1 | 0.0 | 209 |
| 131 | ASN98   | 0.00 | 0.1 | 0.0 | 156 |
| 89  | ASN60G  | 0.01 | 0.1 | 0.0 | 380 |
| 185 | THR147B | 0.00 | 0.1 | 0.0 | 157 |
| 184 | TRP147A | 0.01 | 0.1 | 0.0 | 265 |
| 231 | GLY186C | 0.01 | 0.1 | 0.0 | 282 |
| 248 | LYS202  | 0.00 | 0.1 | 0.0 | 54  |
| 191 | GLY147H | 0.00 | 0.1 | 0.0 | 40  |
| 147 | PHE114  | 0.01 | 0.1 | 0.0 | 210 |
| 232 | LYS186D | 0.01 | 0.1 | 0.0 | 264 |
| 5   | GLY-1   | 0.01 | 0.1 | 0.0 | 276 |
| 252 | ASN204B | 0.00 | 0.1 | 0.0 | 98  |
| 23  | LYS14A  | 0.02 | 0.1 | 0.0 | 928 |
| 74  | VAL52   | 0.00 | 0.1 | 0.0 | 2   |
| 274 | GLY226  | 0.02 | 0.1 | 0.0 | 992 |
| 41  | SER20   | 0.01 | 0.1 | 0.0 | 551 |
| 107 | TYR76   | 0.00 | 0.1 | 0.0 | 173 |
| 17  | LYS9    | 0.01 | 0.1 | 0.0 | 405 |
| 110 | ASN78   | 0.00 | 0.1 | 0.0 | 117 |
| 190 | LYS147G | 0.00 | 0.1 | 0.0 | 121 |
| 192 | GLN151  | 0.00 | 0.1 | 0.0 | 75  |
| 171 | LYS135  | 0.00 | 0.1 | 0.0 | 107 |
| 251 | PHE204A | 0.01 | 0.1 | 0.0 | 427 |
| 105 | THR74   | 0.00 | 0.1 | 0.0 | 106 |
| 124 | PRO92   | 0.02 | 0.1 | 0.0 | 628 |
| 127 | ASN95   | 0.01 | 0.1 | 0.0 | 553 |
| 283 | LYS235  | 0.00 | 0.1 | 0.0 | 111 |
| 194 | SER153  | 0.00 | 0.1 | 0.0 | 114 |
| 227 | LYS185  | 0.01 | 0.1 | 0.0 | 227 |
| 129 | ARG97   | 0.02 | 0.1 | 0.0 | 832 |
| 152 | HSD119  | 0.00 | 0.1 | 0.0 | 14  |
| 126 | TYR94   | 0.01 | 0.1 | 0.0 | 463 |
| 195 | VAL154  | 0.00 | 0.1 | 0.0 | 173 |
| 20  | LEU12   | 0.01 | 0.1 | 0.0 | 609 |
| 214 | ARG173  | 0.01 | 0.1 | 0.0 | 502 |
| 18  | LYS10   | 0.01 | 0.1 | 0.0 | 627 |
| 26  | ARG14D  | 0.02 | 0.1 | 0.0 | 861 |
| 261 | VAL213  | 0.00 | 0.1 | 0.0 | 6   |
| 169 | GLY133  | 0.00 | 0.1 | 0.0 | 64  |
| 104 | ARG73   | 0.00 | 0.1 | 0.0 | 66  |
| 180 | LEU144  | 0.00 | 0.1 | 0.0 | 52  |
| 56  | ARG35   | 0.00 | 0.1 | 0.0 | 199 |
| 217 | ILE176  | 0.00 | 0.1 | 0.0 | 49  |
| 287 | GLN239  | 0.00 | 0.1 | 0.0 | 98  |
| 24  | THR14B  | 0.01 | 0.1 | 0.0 | 268 |
| 60  | GLN38   | 0.01 | 0.1 | 0.0 | 362 |
| 196 | LEU155  | 0.00 | 0.1 | 0.0 | 71  |
| 125 | ARG93   | 0.02 | 0.1 | 0.0 | 894 |
| 120 | ILE88   | 0.00 | 0.1 | 0.0 | 118 |
| 181 | LYS145  | 0.00 | 0.1 | 0.0 | 95  |
| 143 | LYS110  | 0.00 | 0.1 | 0.0 | 139 |
| 188 | VAL147E | 0.00 | 0.1 | 0.0 | 210 |

|     |         |      |     |     |     |
|-----|---------|------|-----|-----|-----|
| 86  | TRP60D  | 0.00 | 0.1 | 0.0 | 193 |
| 279 | VAL231  | 0.00 | 0.1 | 0.0 | 9   |
| 216 | ARG175  | 0.01 | 0.1 | 0.0 | 364 |
| 200 | ASN159  | 0.00 | 0.1 | 0.0 | 49  |
| 220 | ASN179  | 0.00 | 0.1 | 0.0 | 69  |
| 215 | ILE174  | 0.00 | 0.1 | 0.0 | 91  |
| 123 | HSD91   | 0.01 | 0.1 | 0.0 | 382 |
| 80  | CYS58   | 0.00 | 0.1 | 0.0 | 10  |
| 96  | LEU65   | 0.00 | 0.1 | 0.0 | 32  |
| 132 | LEU99   | 0.00 | 0.1 | 0.0 | 85  |
| 128 | TRP96   | 0.01 | 0.1 | 0.0 | 445 |
| 15  | PHE7    | 0.01 | 0.1 | 0.0 | 342 |
| 106 | ARG75   | 0.01 | 0.1 | 0.0 | 299 |
| 288 | LYS240  | 0.01 | 0.1 | 0.0 | 387 |
| 117 | LEU85   | 0.00 | 0.1 | 0.0 | 11  |
| 281 | ARG233  | 0.00 | 0.1 | 0.0 | 148 |
| 146 | ALA113  | 0.00 | 0.1 | 0.0 | 81  |
| 138 | LEU105  | 0.00 | 0.1 | 0.0 | 46  |
| 173 | ARG137  | 0.00 | 0.1 | 0.0 | 72  |
| 101 | LYS70   | 0.00 | 0.1 | 0.0 | 24  |
| 134 | ARG101  | 0.01 | 0.1 | 0.0 | 365 |
| 159 | ARG126  | 0.01 | 0.1 | 0.0 | 233 |
| 237 | CYS191  | 0.00 | 0.1 | 0.0 | 37  |
| 285 | TRP237  | 0.01 | 0.1 | 0.0 | 286 |
| 57  | LYS36   | 0.00 | 0.1 | 0.0 | 188 |
| 58  | SER36A  | 0.01 | 0.1 | 0.0 | 343 |
| 103 | SER72   | 0.00 | 0.1 | 0.0 | 80  |
| 59  | PRO37   | 0.01 | 0.1 | 0.0 | 309 |
| 284 | LYS236  | 0.00 | 0.1 | 0.0 | 218 |
| 249 | SER203  | 0.00 | 0.1 | 0.0 | 29  |
| 218 | THR177  | 0.00 | 0.1 | 0.0 | 73  |
| 145 | VAL112  | 0.00 | 0.1 | 0.0 | 44  |
| 150 | TYR117  | 0.00 | 0.1 | 0.0 | 109 |
| 122 | ILE90   | 0.01 | 0.1 | 0.0 | 276 |
| 144 | PRO111  | 0.00 | 0.1 | 0.0 | 108 |
| 119 | LYS87   | 0.01 | 0.1 | 0.0 | 273 |
| 82  | LEU60   | 0.00 | 0.1 | 0.0 | 228 |
| 47  | MET26   | 0.00 | 0.1 | 0.0 | 141 |
| 45  | ILE24   | 0.01 | 0.1 | 0.0 | 248 |
| 14  | LEU6    | 0.00 | 0.1 | 0.0 | 217 |
| 62  | LEU40   | 0.00 | 0.1 | 0.0 | 19  |
| 137 | ALA104  | 0.00 | 0.1 | 0.0 | 36  |
| 153 | PRO120  | 0.00 | 0.1 | 0.0 | 18  |
| 121 | TYR89   | 0.00 | 0.1 | 0.0 | 220 |
| 90  | PHE60H  | 0.00 | 0.1 | 0.0 | 74  |
| 254 | ARG206  | 0.00 | 0.1 | 0.0 | 169 |
| 255 | TRP207  | 0.00 | 0.1 | 0.0 | 19  |
| 189 | GLY147F | 0.00 | 0.1 | 0.0 | 77  |
| 55  | PHE34   | 0.00 | 0.1 | 0.0 | 44  |
| 276 | TYR228  | 0.00 | 0.1 | 0.0 | 22  |
| 136 | ILE103  | 0.00 | 0.1 | 0.0 | 70  |
| 111 | ILE79   | 0.00 | 0.1 | 0.0 | 48  |
| 280 | PHE232  | 0.00 | 0.1 | 0.0 | 25  |
| 199 | VAL158  | 0.00 | 0.1 | 0.0 | 26  |

|     |         |      |     |     |     |
|-----|---------|------|-----|-----|-----|
| 282 | LEU234  | 0.00 | 0.1 | 0.0 | 107 |
| 135 | ASP102  | 0.00 | 0.1 | 0.0 | 53  |
| 206 | ARG165  | 0.00 | 0.1 | 0.0 | 27  |
| 109 | ARG77A  | 0.00 | 0.1 | 0.0 | 166 |
| 95  | LEU64   | 0.00 | 0.1 | 0.0 | 28  |
| 38  | VAL17   | 0.00 | 0.1 | 0.0 | 29  |
| 209 | CYS168  | 0.00 | 0.1 | 0.0 | 30  |
| 88  | LYS60F  | 0.00 | 0.1 | 0.0 | 63  |
| 83  | TYR60A  | 0.00 | 0.1 | 0.0 | 129 |
| 13  | PRO5    | 0.00 | 0.1 | 0.0 | 67  |
| 113 | LYS81   | 0.00 | 0.1 | 0.0 | 34  |
| 193 | PRO152  | 0.00 | 0.1 | 0.0 | 34  |
| 98  | ARG67   | 0.00 | 0.1 | 0.0 | 35  |
| 289 | VAL241  | 0.00 | 0.1 | 0.0 | 143 |
| 148 | SER115  | 0.00 | 0.1 | 0.0 | 42  |
| 28  | LEU14F  | 0.00 | 0.1 | 0.0 | 45  |
| 165 | LEU129C | 0.00 | 0.1 | 0.0 | 48  |
| 11  | LEU3    | 0.00 | 0.1 | 0.0 | 51  |
| 78  | ALA56   | 0.00 | 0.1 | 0.0 | 52  |
| 81  | LEU59   | 0.00 | 0.1 | 0.0 | 54  |
| 46  | GLY25   | 0.00 | 0.1 | 0.0 | 65  |
| 208 | VAL167  | 0.00 | 0.1 | 0.0 | 89  |
| 198 | VAL157  | 0.00 | 0.1 | 0.0 | 98  |
| 12  | ARG4    | 0.00 | 0.1 | 0.0 | 103 |
| 9   | CYS1    | 0.00 | 0.1 | 0.0 | 4   |
| 10  | GLY2    | 0.00 | 0.1 | 0.0 | 2   |
| 37  | ILE16   | 0.00 | 0.1 | 0.0 | 16  |
| 48  | SER27   | 0.00 | 0.1 | 0.0 | 19  |
| 49  | PRO28   | 0.00 | 0.1 | 0.0 | 9   |
| 50  | TRP29   | 0.00 | 0.1 | 0.0 | 3   |
| 51  | GLN30   | 0.00 | 0.1 | 0.0 | 2   |
| 53  | MET32   | 0.00 | 0.1 | 0.0 | 3   |
| 54  | LEU33   | 0.00 | 0.1 | 0.0 | 4   |
| 63  | LEU41   | 0.00 | 0.1 | 0.0 | 12  |
| 64  | CYS42   | 0.00 | 0.1 | 0.0 | 2   |
| 68  | LEU46   | 0.00 | 0.1 | 0.0 | 2   |
| 73  | TRP51   | 0.00 | 0.1 | 0.0 | 30  |
| 75  | LEU53   | 0.00 | 0.1 | 0.0 | 6   |
| 76  | THR54   | 0.00 | 0.1 | 0.0 | 9   |
| 77  | ALA55   | 0.00 | 0.1 | 0.0 | 10  |
| 97  | VAL66   | 0.00 | 0.1 | 0.0 | 3   |
| 100 | GLY69   | 0.00 | 0.1 | 0.0 | 7   |
| 112 | GLU80   | 0.00 | 0.1 | 0.0 | 10  |
| 114 | ILE82   | 0.00 | 0.1 | 0.0 | 24  |
| 115 | SER83   | 0.00 | 0.1 | 0.0 | 8   |
| 116 | MET84   | 0.00 | 0.1 | 0.0 | 26  |
| 139 | MET106  | 0.00 | 0.1 | 0.0 | 18  |
| 141 | LEU108  | 0.00 | 0.1 | 0.0 | 17  |
| 151 | ILE118  | 0.00 | 0.1 | 0.0 | 13  |
| 157 | PRO124  | 0.00 | 0.1 | 0.0 | 4   |
| 162 | ALA129  | 0.00 | 0.1 | 0.0 | 26  |
| 172 | GLY136  | 0.00 | 0.1 | 0.0 | 2   |
| 174 | VAL138  | 0.00 | 0.1 | 0.0 | 12  |
| 175 | THR139  | 0.00 | 0.1 | 0.0 | 7   |

|     |        |      |     |     |    |
|-----|--------|------|-----|-----|----|
| 176 | GLY140 | 0.00 | 0.1 | 0.0 | 8  |
| 177 | TRP141 | 0.00 | 0.1 | 0.0 | 18 |
| 178 | GLY142 | 0.00 | 0.1 | 0.0 | 5  |
| 179 | ASN143 | 0.00 | 0.1 | 0.0 | 23 |
| 201 | LEU160 | 0.00 | 0.1 | 0.0 | 2  |
| 202 | PRO161 | 0.00 | 0.1 | 0.0 | 2  |
| 204 | VAL163 | 0.00 | 0.1 | 0.0 | 5  |
| 221 | MET180 | 0.00 | 0.1 | 0.0 | 23 |
| 223 | CYS182 | 0.00 | 0.1 | 0.0 | 1  |
| 224 | ALA183 | 0.00 | 0.1 | 0.0 | 1  |
| 225 | GLY184 | 0.00 | 0.1 | 0.0 | 2  |
| 240 | ASP194 | 0.00 | 0.1 | 0.0 | 3  |
| 247 | MET201 | 0.00 | 0.1 | 0.0 | 5  |
| 256 | TYR208 | 0.00 | 0.1 | 0.0 | 11 |
| 258 | MET210 | 0.00 | 0.1 | 0.0 | 2  |
| 260 | ILE212 | 0.00 | 0.1 | 0.0 | 2  |
| 275 | PHE227 | 0.00 | 0.1 | 0.0 | 10 |
| 277 | THR229 | 0.00 | 0.1 | 0.0 | 18 |
| 286 | ILE238 | 0.00 | 0.1 | 0.0 | 52 |
| 52  | VAL31  | 0.00 | NA  | NA  | 0  |
| 65  | GLY43  | 0.00 | NA  | NA  | 0  |
| 66  | ALA44  | 0.00 | NA  | NA  | 0  |
| 67  | SER45  | 0.00 | NA  | NA  | 0  |
| 99  | ILE68  | 0.00 | NA  | NA  | 0  |
| 154 | VAL121 | 0.00 | NA  | NA  | 0  |
| 155 | CYS122 | 0.00 | NA  | NA  | 0  |
| 222 | PHE181 | 0.00 | NA  | NA  | 0  |
| 239 | GLY193 | 0.00 | NA  | NA  | 0  |
| 242 | GLY196 | 0.00 | NA  | NA  | 0  |
| 243 | GLY197 | 0.00 | NA  | NA  | 0  |
| 244 | PRO198 | 0.00 | NA  | NA  | 0  |
| 245 | PHE199 | 0.00 | NA  | NA  | 0  |
| 246 | VAL200 | 0.00 | NA  | NA  | 0  |
| 257 | GLN209 | 0.00 | NA  | NA  | 0  |
| 259 | GLY211 | 0.00 | NA  | NA  | 0  |

## References

- 1 B. Fuglestad, P. M. Gasper, M. Tonelli, J. A. McCammon, P. R. Markwick and E. A. Komives, *Biophysical Journal*, 2012, **103**, 79–88.
- 2 J. Xiao, R. L. Melvin and F. R. Salsbury, *Physical Chemistry Chemical Physics*, 2017, **19**, 24522–24533.
- 3 F. Noé, H. Wu, J. H. Prinz and N. Plattner, *Journal of Chemical Physics*, 2013, **139**, year.
- 4 J. H. Prinz, H. Wu, M. Sarich, B. Keller, M. Senne, M. Held, J. D. Chodera, C. Schütte and F. Noé, *Journal of Chemical Physics*, 2011, **134**, 1–23.
- 5 R. J. G. B. Campello, D. Moulavi and J. Sander, *Advances in Knowledge Discovery and Data Mining*, 2013, 160–172.
- 6 R. L. Melvin, R. C. Godwin, J. Xiao, W. G. Thompson, K. S. Berenhaut and F. R. Salsbury, *Journal of Chemical Theory and Computation*, 2016, **12**, 6130–6146.
- 7 R. L. Melvin, J. Xiao, R. C. Godwin, K. S. Berenhaut and F. R. Salsbury, *Protein Science*, 2018, **27**, 62–75.

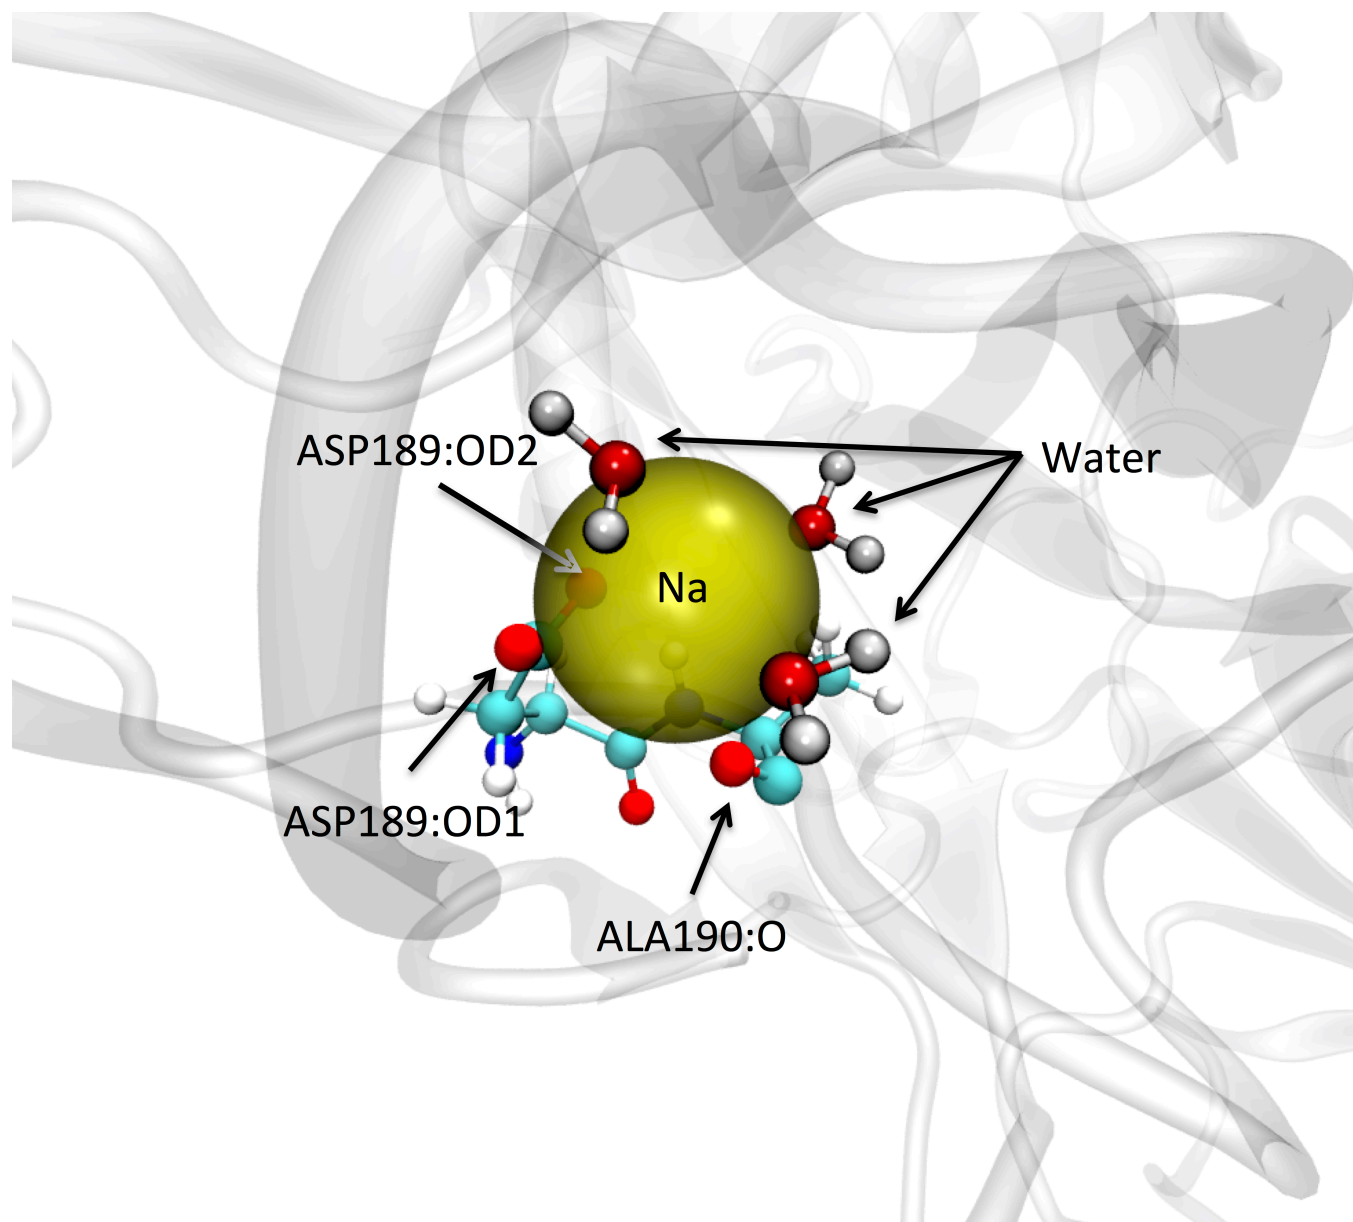

**Fig. S1** The bound Na<sup>+</sup> at the “inner” Na<sup>+</sup>-binding site is coordinated to the side chain oxygen atoms of ASP189, main chain oxygen atom of ALA190, and three surrounding water molecules. The bound Na<sup>+</sup> is visualized as a yellow sphere using van der Waals representation. Oxygen, hydrogen, carbon and nitrogen atoms are colored in red, white, cyan and blue respectively.



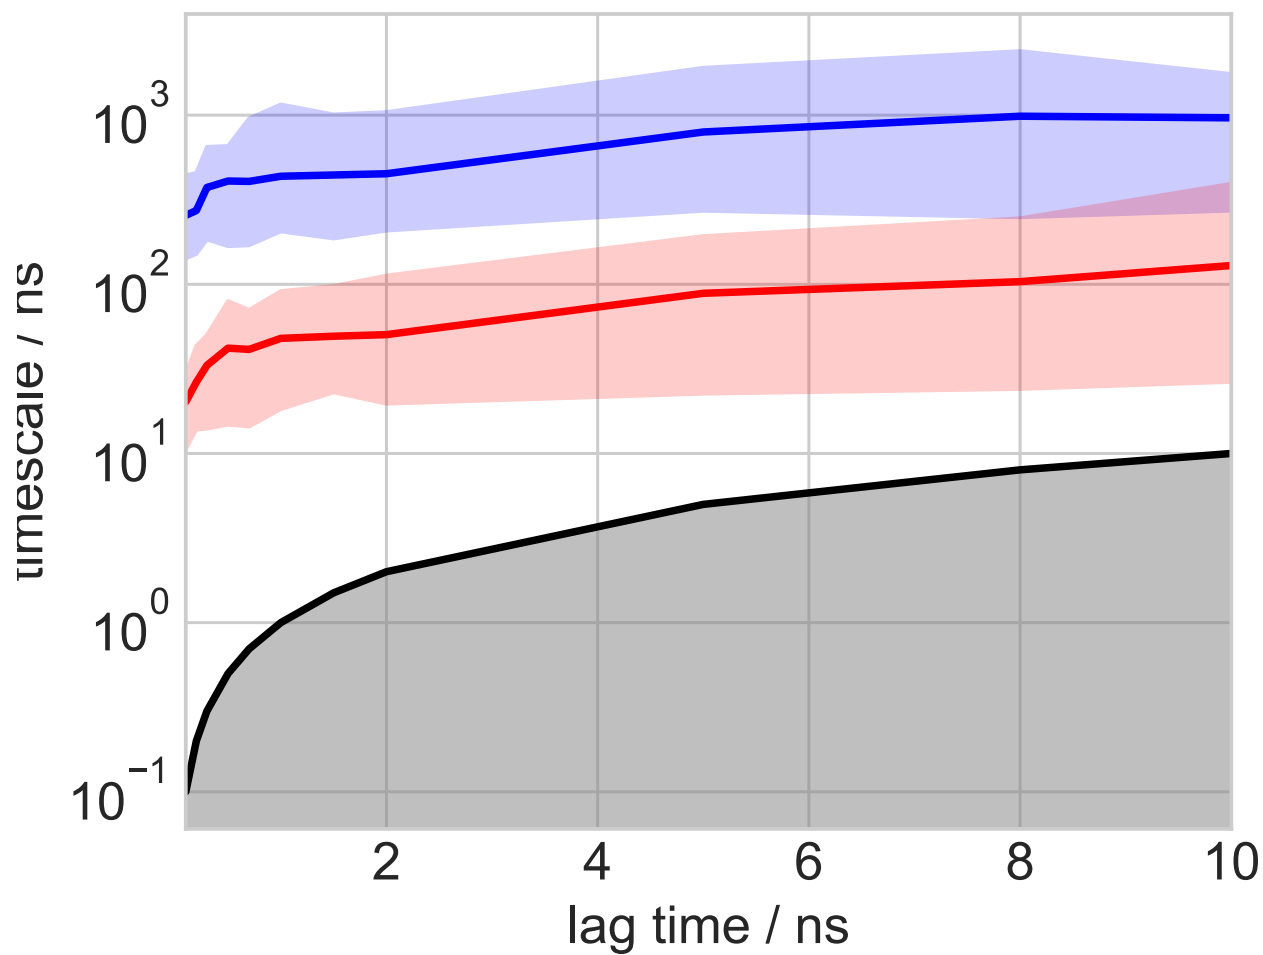

**Fig. S2** Implied timescales based on the transition matrix from the reversible Bayesian hidden Markov model estimator<sup>3</sup> indicate 1 ns is a proper Markov lag time. The time scales of the underlying processes start to be level with 95% confidence interval after 1 ns. The relaxation time for the two slowest processes is about 435 ns and 47 ns.

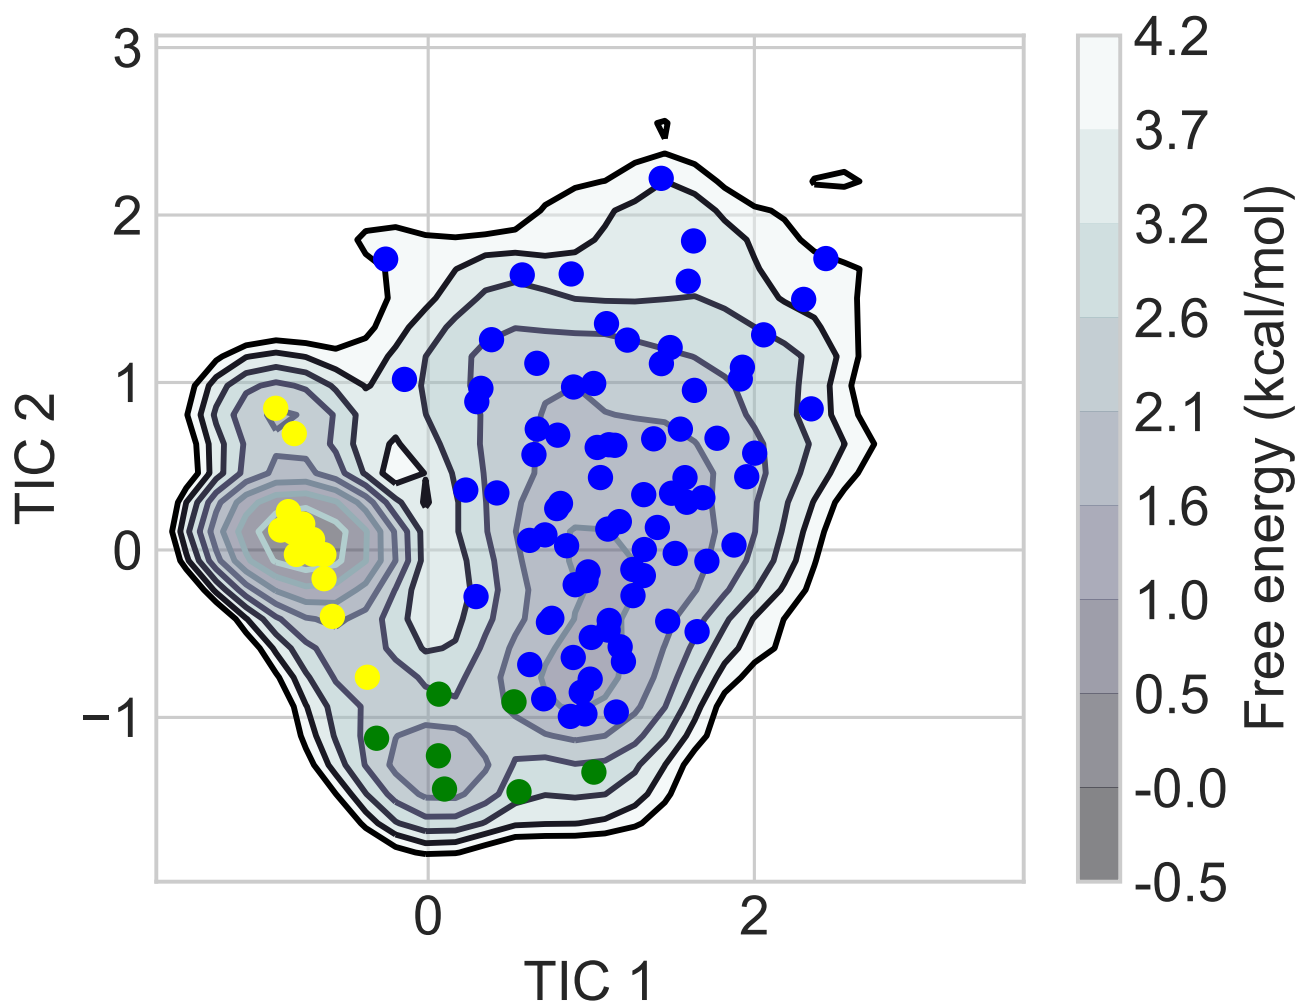

**Fig. S3** Assignment of the metastable states in hidden Markov modeling. The green, blue and yellow dots respectively present microstates inside the “outer”-binding, unbound or non-specifically bound elsewhere, and “inner”-binding states.

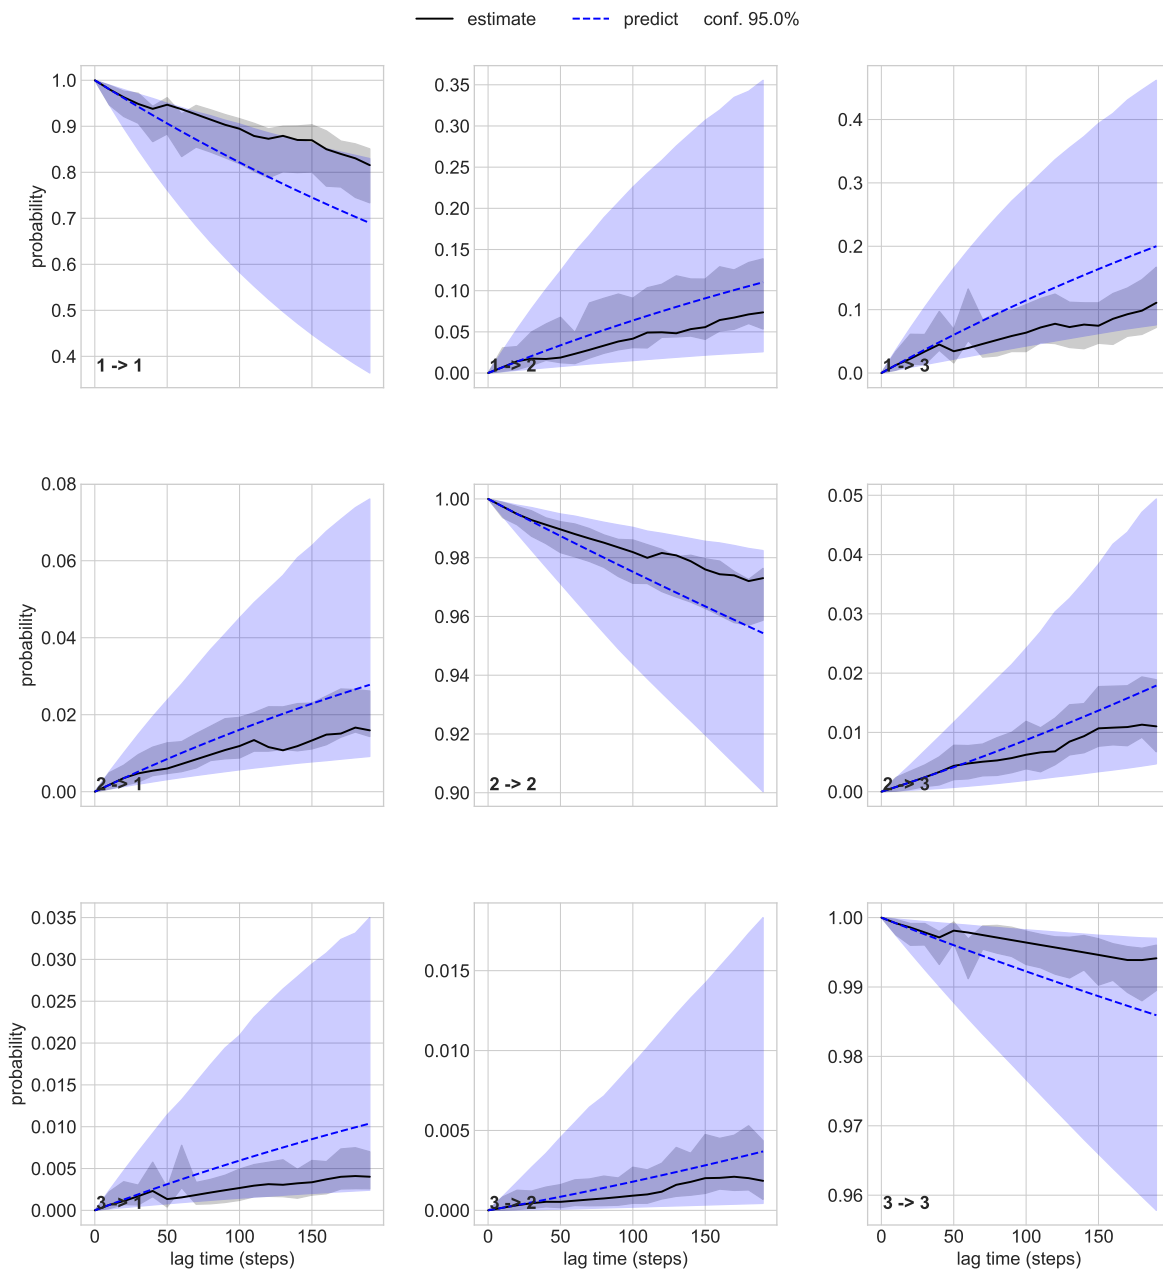

**Fig. S4** The resulting HMM with a Markov lag time of 1 ns successfully passes the Chapman-Kolmogorov test<sup>4</sup> with 95% confidence interval. Each step in the figures represent 0.1 ns.

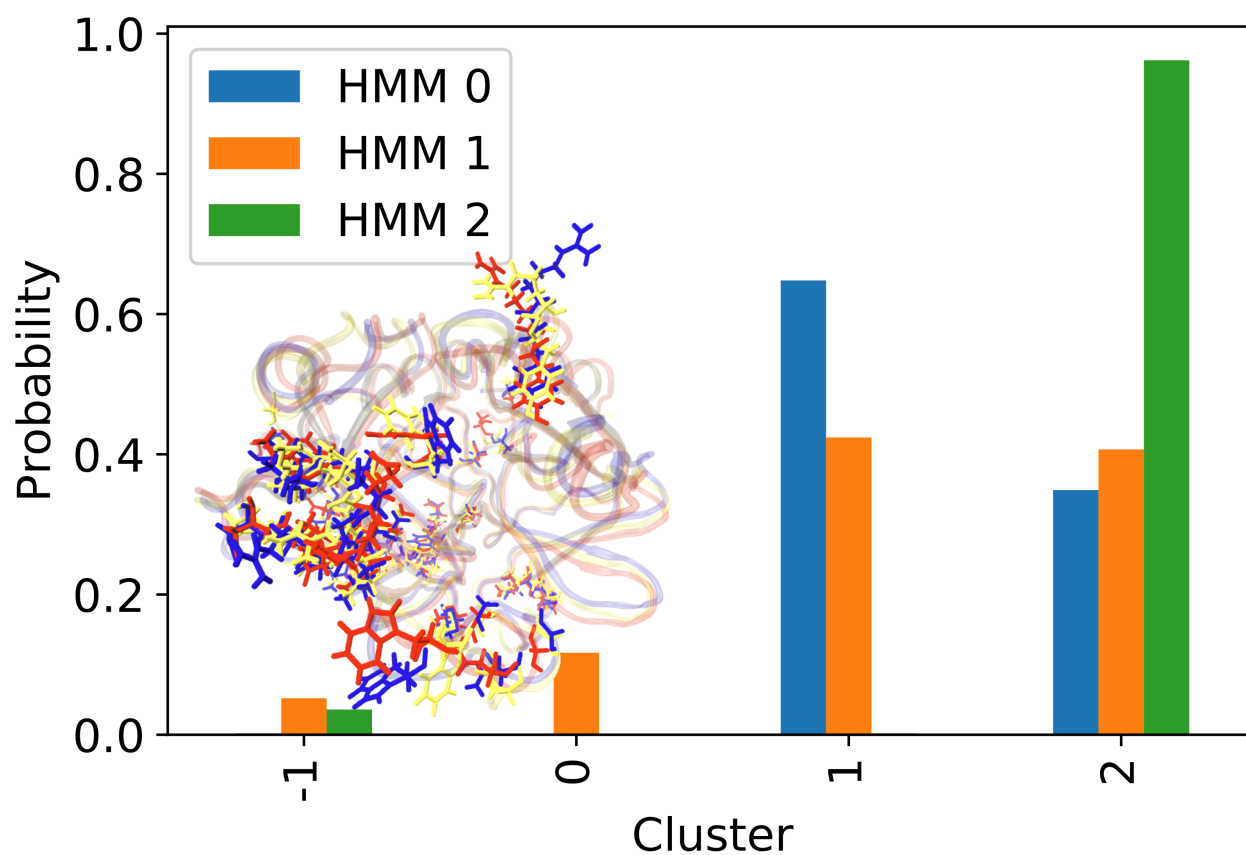

**Fig. S5** Distributions of the backbone torsion angles of the residues allosterically responding to  $\text{Na}^+$ -binding shown in Figure 3. The median structures of the cluster 0, 1, and 2 are respectively displayed in yellow, blue, and red. The side chains of the residues that allosterically respond to  $\text{Na}^+$ -binding (see nodes in Figure 3a&b) show different orientations upon the  $\text{Na}^+$ -binding statuses. HMM0, HMM1, and HMM2 stand for the outer  $\text{Na}^+$ -bound,  $\text{Na}^+$ -unbound, and inner  $\text{Na}^+$ -bound modes. Hierarchical Density-Based Spatial Clustering of Applications with Noise (HDBSCAN) clustering algorithm<sup>5</sup>, which has recently proven sensitive and effective in grouping local conformational changes and highlighting representative features<sup>6,7</sup>, was adapted here with a minimum cluster size of 10 observations to eliminate the number of clusters representing noise (denoted as cluster -1 in the figure). Other parameters in the clustering algorithm was set by the default values as followed: `min_samples=None`, `metric='euclidean'`, `alpha=1.0`, `p=None`, `algorithm='best'`, `leaf_size=40`, `memory=Memory(location=None)`, `approx_min_span_tree=True`, `gen_min_span_tree=False`, `core_dist_n_jobs=4`, `cluster_selection_method='eom'`, `allow_single_cluster=False`, `prediction_data=False`, `match_reference_implementation=False`. More details of these parameters can be found from the online documentation of HDBSCAN API at <https://hdbscan.readthedocs.io/en/0.8.18/api.html>
